# Supplementary material
Source: PubMed Central journal article supplement (PMC6314045)
Supplement: NIHMS982502-supplement-Supp_figS1-7.pdf [file NIHMS982502-supplement-Supp_figS1-7.pdf]

# Supplemental Figures

## **HDL Mimetic Peptide 4F Mitigates A $\beta$ -Induced Inhibition of ApoE Secretion and Lipidation in Primary Astrocytes and Microglia**

Dustin Chernick<sup>1</sup>, Stephanie Ortiz-Valle<sup>1</sup>, Angela Jeong<sup>2</sup>, Suresh Kumar Swaminathan<sup>3</sup>, Karunya Kandimalla<sup>3</sup>, G. William Rebeck<sup>4</sup>, and Ling Li<sup>1,2,5</sup> \*

Departments of Pharmacology<sup>1</sup>, Experimental and Clinical Pharmacology<sup>2</sup>, and Pharmaceutics<sup>3</sup>, University of Minnesota, Minneapolis, MN, USA; Department of Neuroscience<sup>4</sup>, Georgetown University, Washington, D.C., USA; Graduate Program in Neuroscience<sup>5</sup>, University of Minnesota, Minneapolis, MN, USA

**Fig. S1**

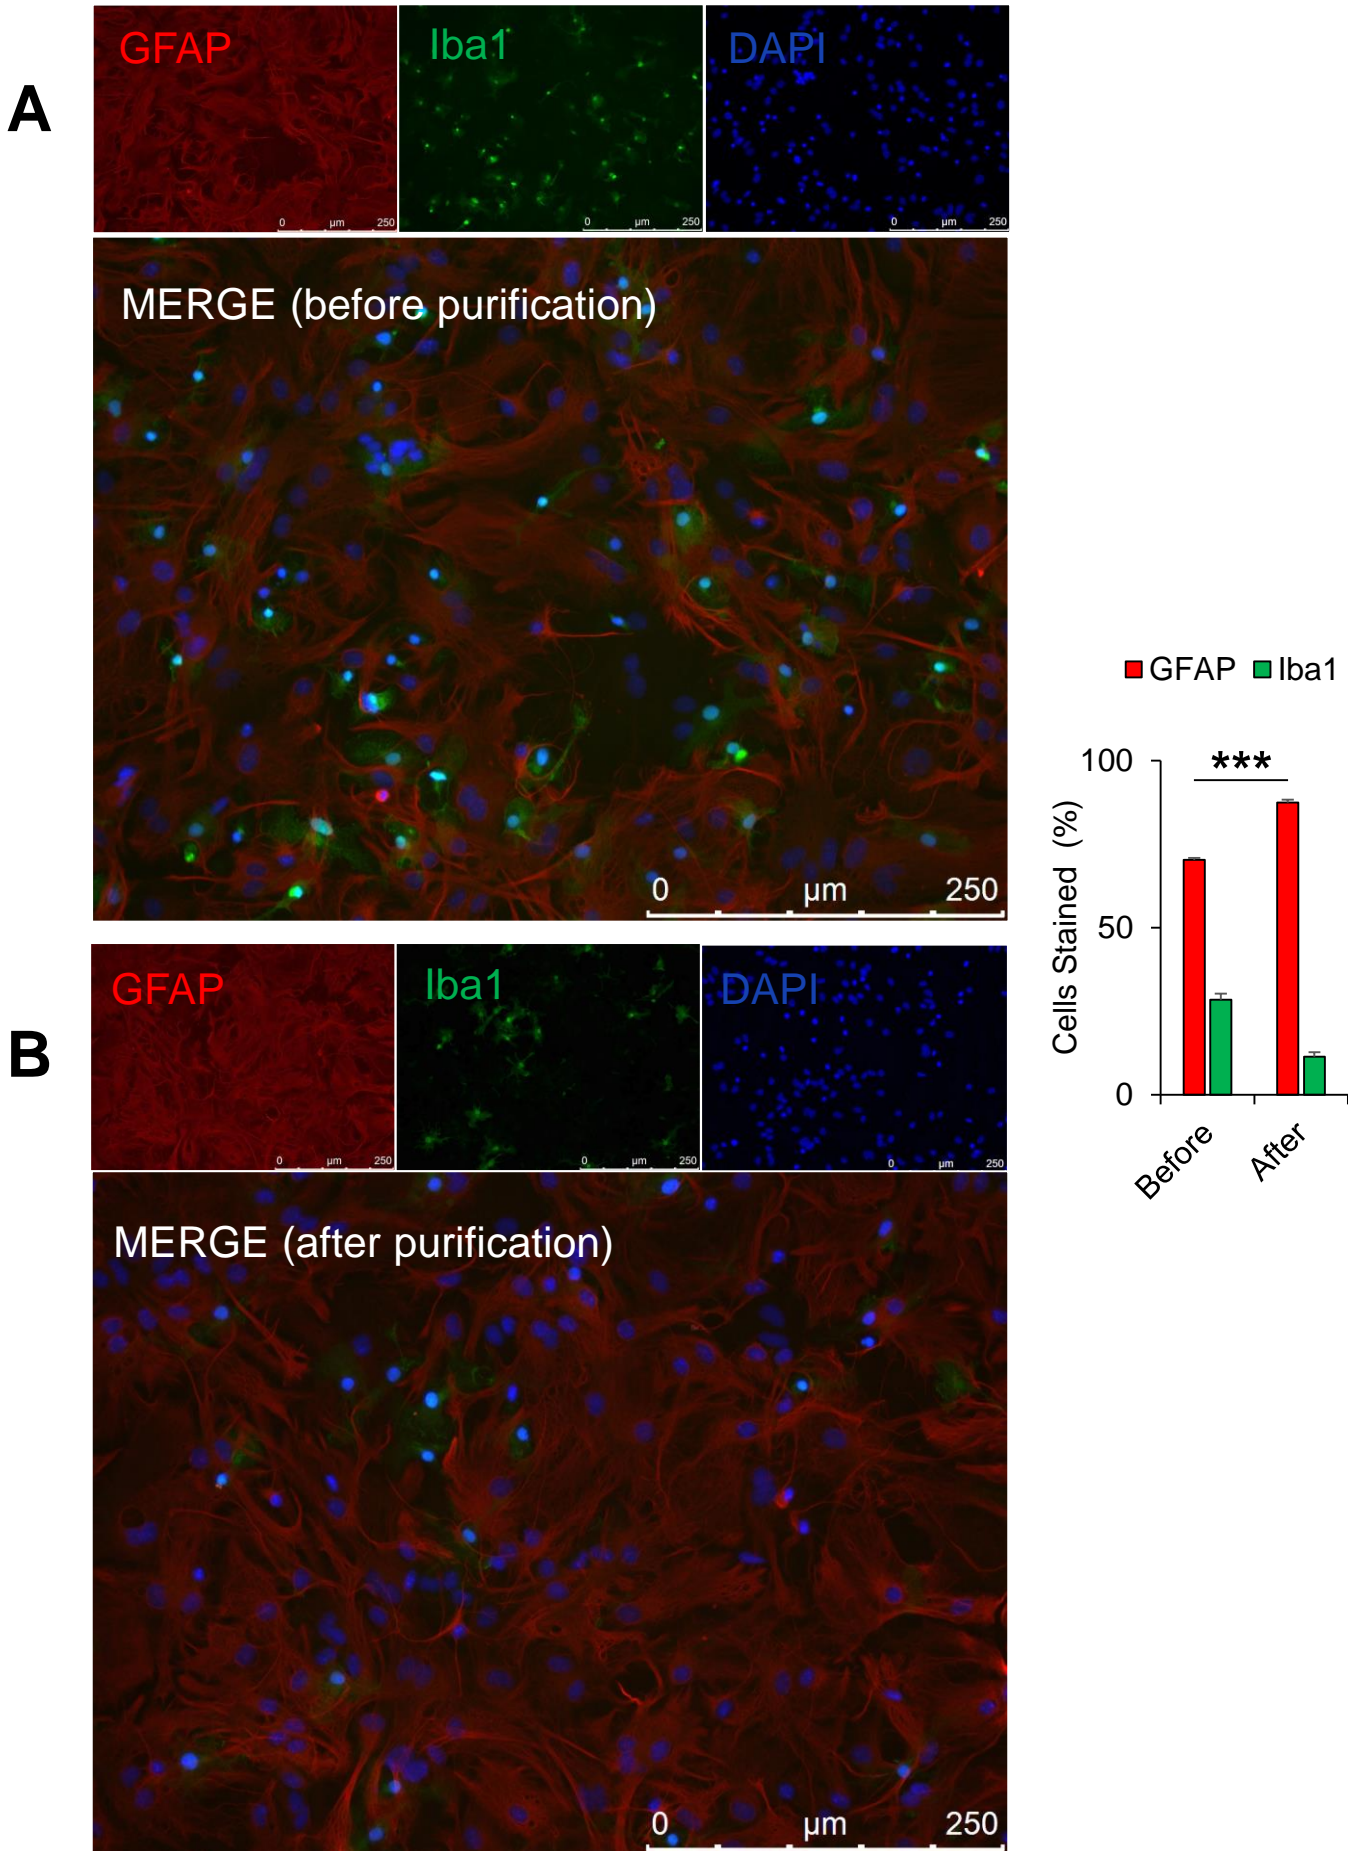

**Fig. S1. Purification of primary mouse astrocyte cultures.** Immunofluorescence analysis of markers for astrocytes (GFAP), microglia (Iba1), and the nuclei (DAPI) in mixed glial cultures before (A) and after (B) purification (n=3 cultures). GFAP – glial fibrillary acidic protein; Iba1 - ionized calcium-binding adapter molecule 1; DAPI - 4',6-diamidino-2-phenylindole. \*\*\* =  $p < 0.001$ .

**Fig. S2**

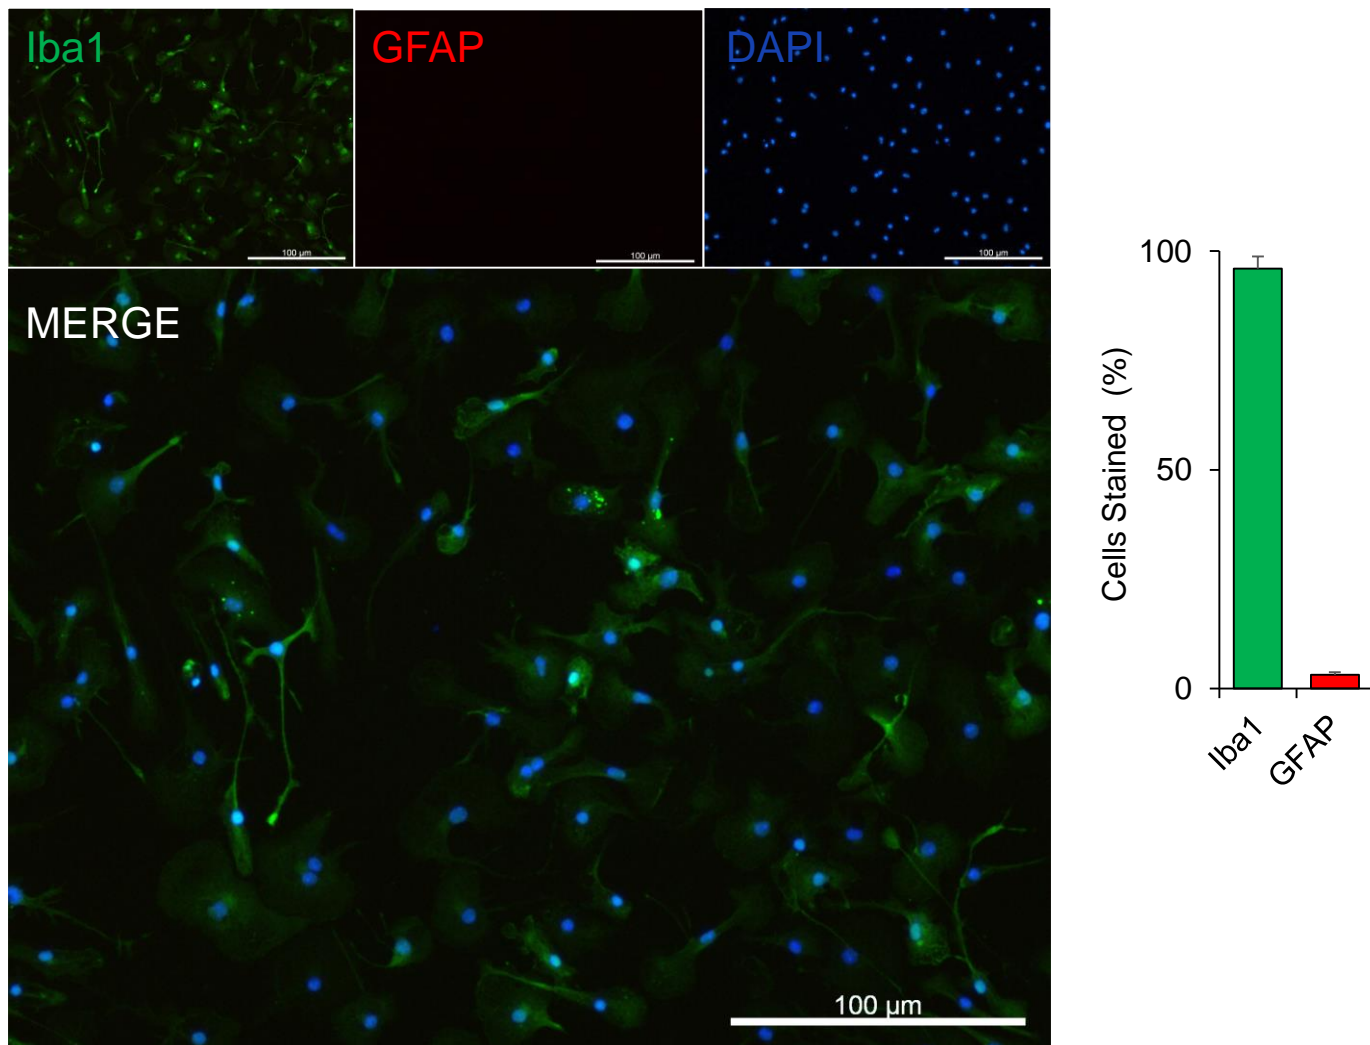

**Fig. S2. Purity of primary mouse microglial cultures.** Immunofluorescent analysis of markers for microglia (Iba1), astrocytes (GFAP), and the nuclei (DAPI) in purified primary mouse microglial cultures (n=5 cultures). Iba1 - ionized calcium-binding adapter molecule 1; GFAP – glial fibrillary acidic protein; DAPI - 4',6-diamidino-2-phenylindole.

**Fig. S3**

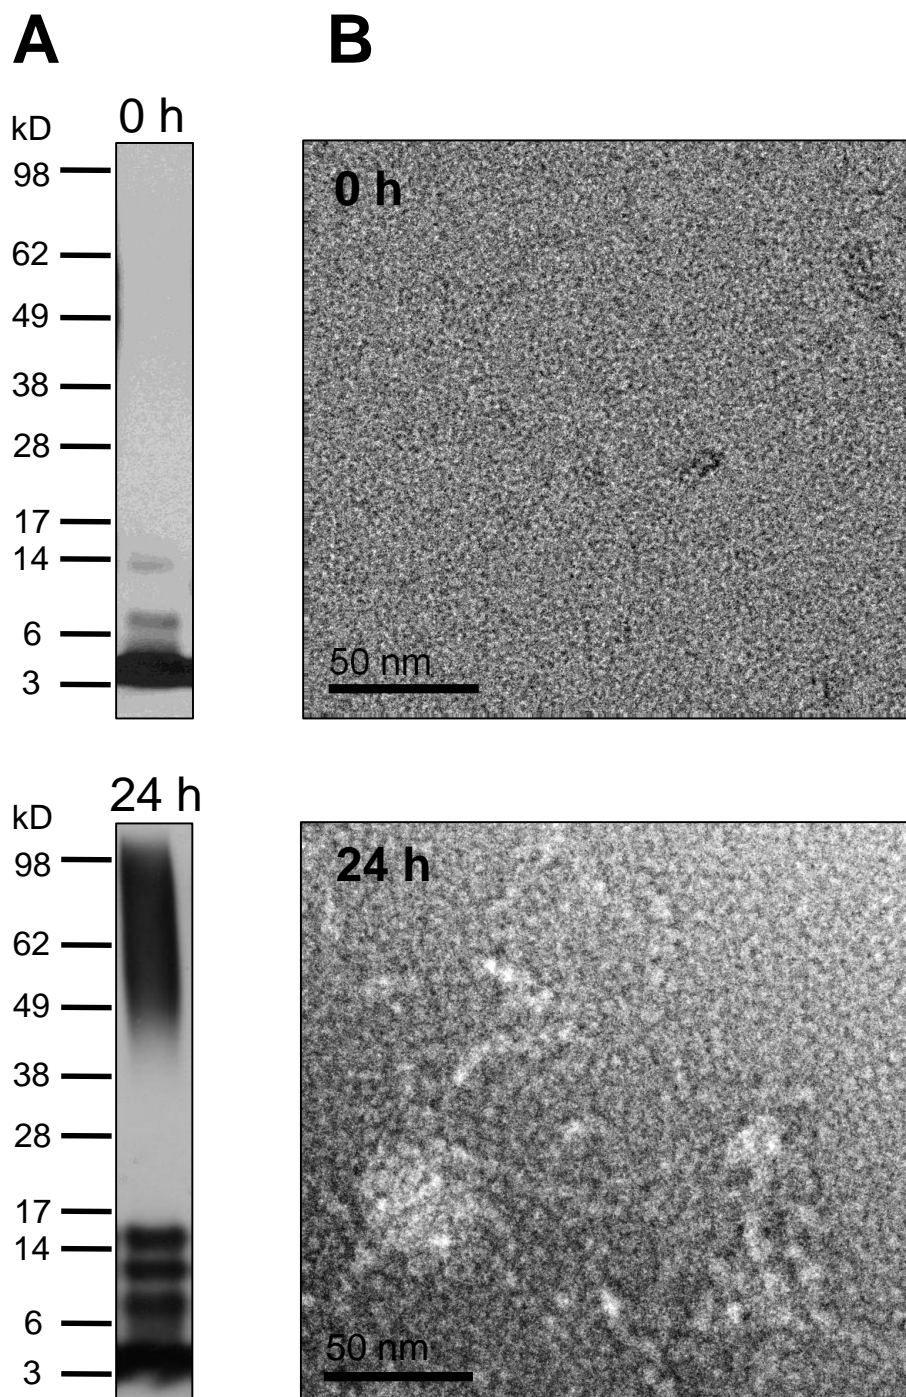

**Fig. S3. Characterization of A $\beta$  preparations.** Representative images of Western blot (**A**) and transmission electron microscopy (TEM) (**B**) analysis of A $\beta$  preparations (n=2) at time 0 and after 24 h incubation.

**Fig. S4**

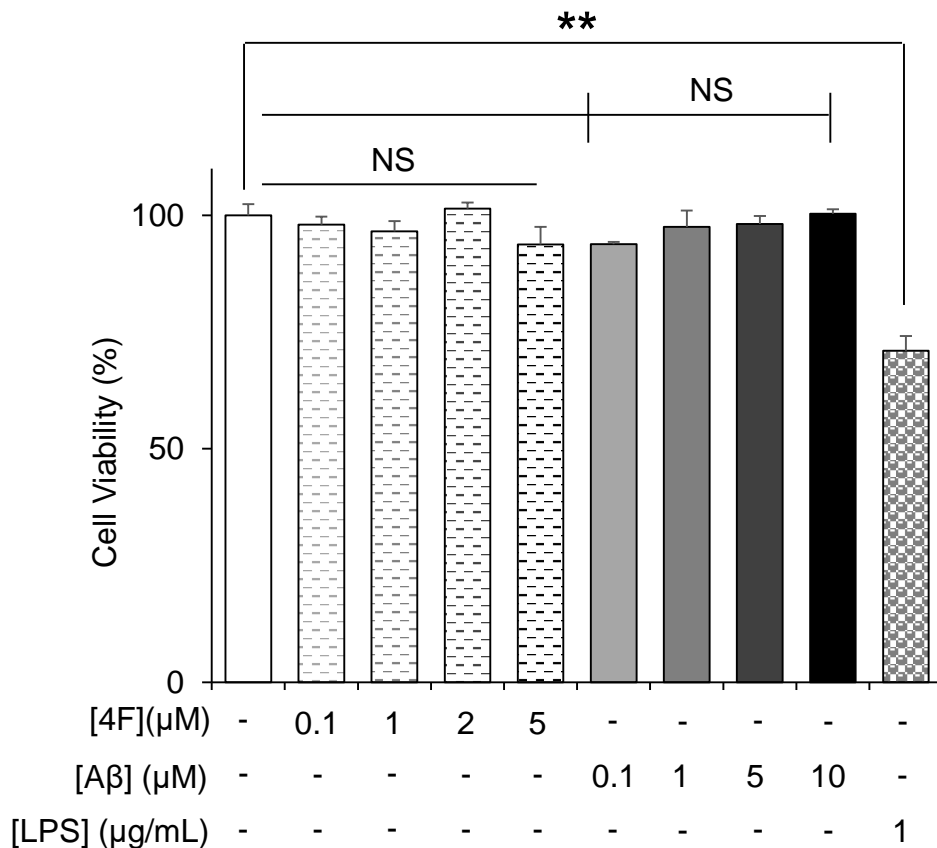

**Fig. S4. 4F and A $\beta$  treatment do not affect cell survival in primary mouse astrocyte cultures.** The cultures were treated with different concentrations of 4F or A $\beta$  for 24 h and followed by the CellTiter-Blue® Cell Viability Assay (Promega; Cat# G8080) (n=3 cultures). LPS was included as control. \*\* =  $p < 0.01$ ; NS, not significant.

**Fig. S5**

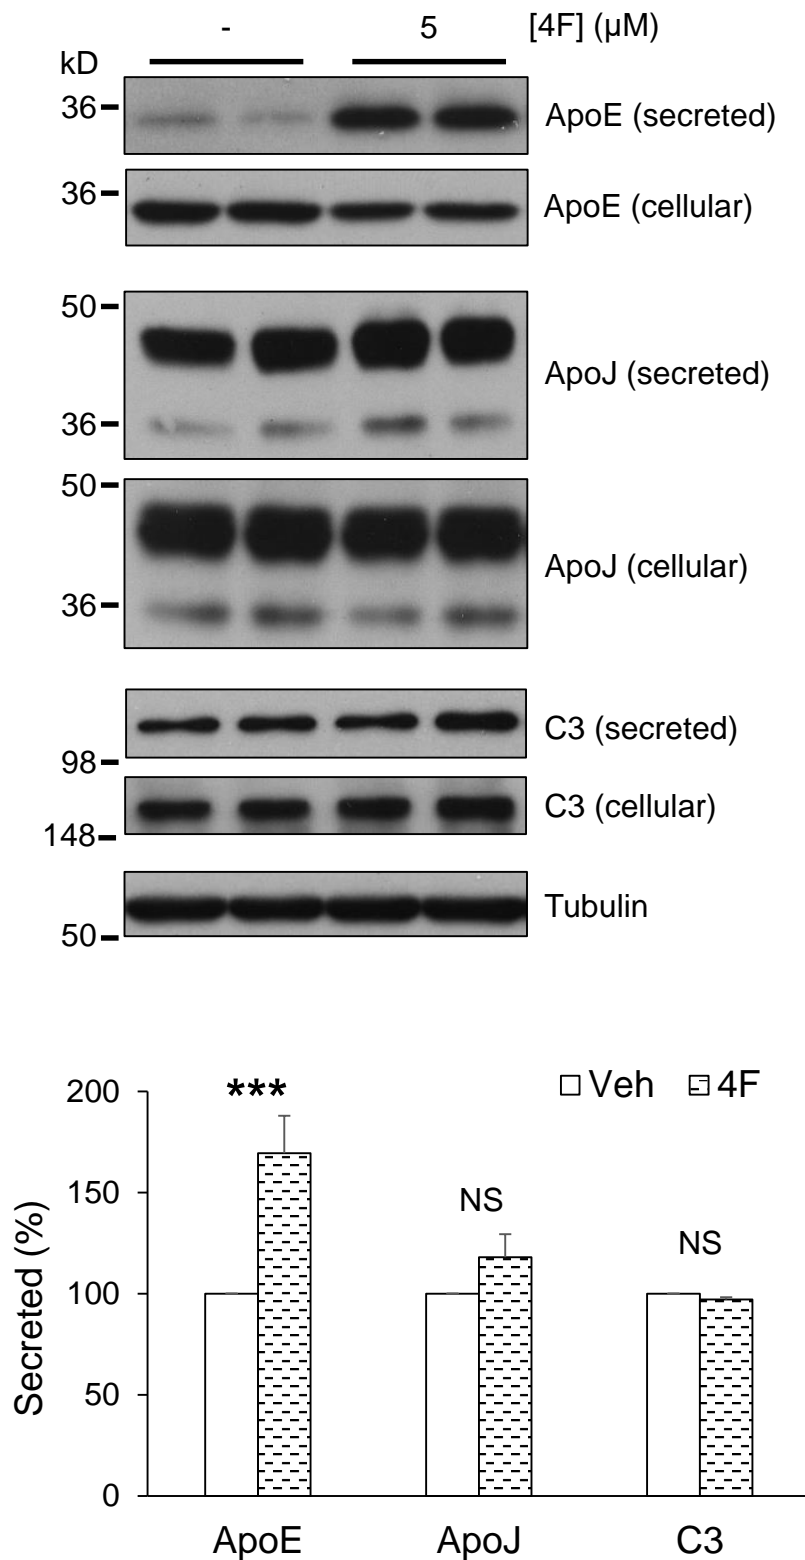

**Fig. S5. Specific effects of 4F on apoE secretion in primary mouse astrocytes.** Western blot analysis of apoE, apoJ, and complement C3 in conditioned media and cell lysates of primary astrocytes treated with or without 4F for 24h (n=3 independent experiments with each treatment in duplicate). \*\*\* =  $p < 0.001$ ; NS, not significant.

**Fig. S6**

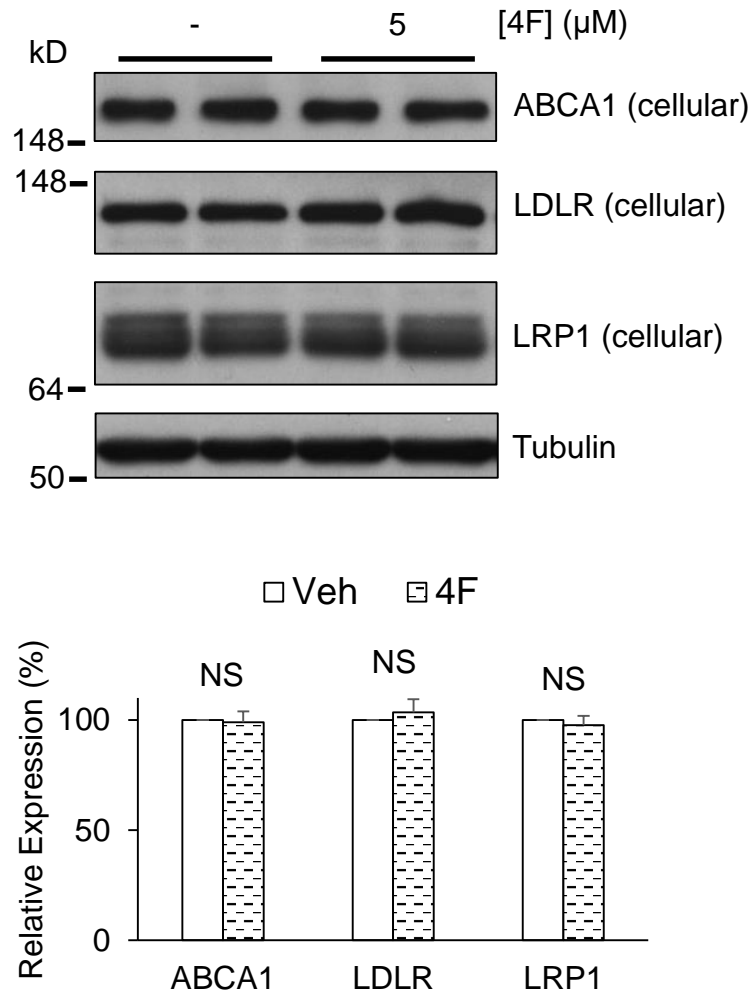

**Fig. S6. 4F treatment does not affect the cellular levels of ABCA1, LDLR, and LRP1 in primary mouse astrocytes.** Western blot analysis of ABCA1, LDLR, and LRP1 in cell lysates of primary astrocytes treated with or without 4F for 24h (n=3 independent experiments with each treatment in duplicate). Note that the same blots as in Fig. S5 were used to probe proteins in this figure. NS, not significant.

Fig. S7

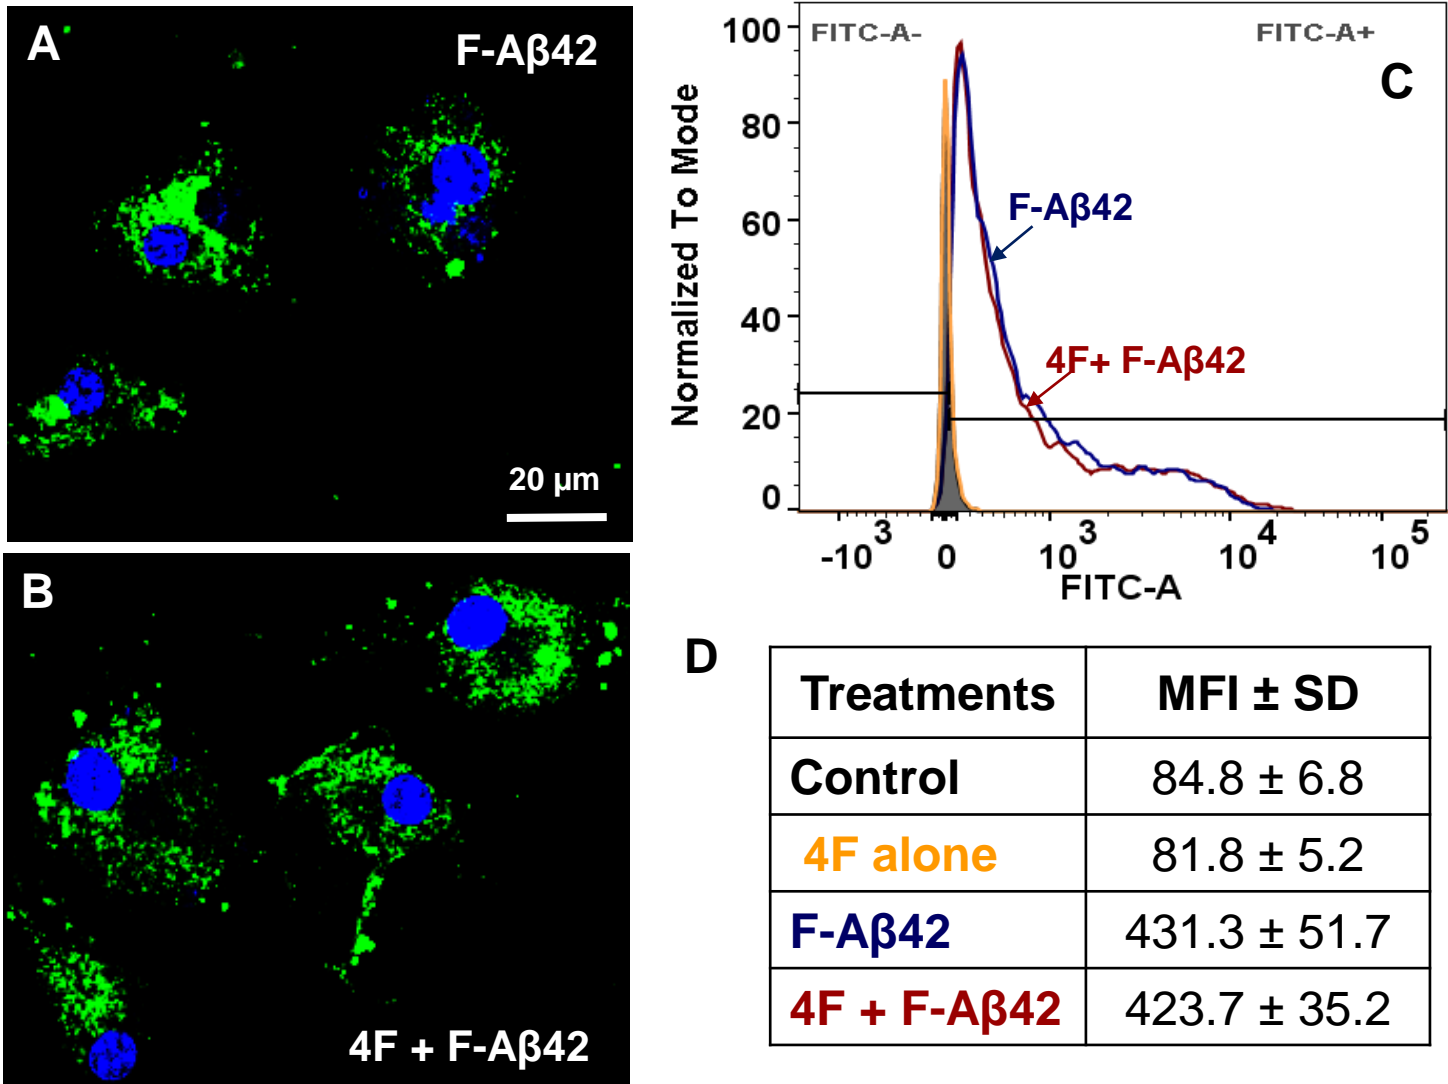

**Fig. S7. 4F treatment does not affect the uptake of F-A $\beta$ 42 in primary mouse astrocytes.** Confocal microscopy (**A**, **B**) images and histograms from flowcytometry (**C**) of primary astrocytes treated with 1.6 $\mu$ M F-A $\beta$ 42 alone (**A**) or in combination with 5 $\mu$ M 4F (**B**) for 1 h at 37  $^{\circ}$ C. Blue: DAPI, Green: F-A $\beta$ 42. (**D**) Flowcytometry data analysis: FITC positive and negative cells were initially gated and then median fluorescence intensity (MFI) of FITC positive cells were obtained. Data is presented as average  $\pm$  SD (n= 3 cultures).
